# Supplementary material for: Transcriptomic landscape of sodium butyrate-induced growth inhibition of human colorectal cancer organoids
Source: Royal Society of Chemistry journal article supplement (doi:10.1039/d2mo00127f), 2022-07-15
Supplement: d2mo00127f2.pdf [file d2mo00127f2.pdf]

## Transcriptomic Landscape of Sodium Butyrate-Induced Growth Inhibition on Human Colorectal Cancer Organoids

### Supplementary methods, figures, and tables

#### Materials and Methods

##### Cryopreservation and Resuscitation of Organoids

Cryopreservation was undertaken after the growth status of organoid was stable. To stock organoids, organoids were harvested using cold PBS and then centrifuged at 1700 rpm for 3 min at 4 °C. Supernatant was removed and organoid pellet was digested with TrypLE™ Express Enzyme (Thermo, USA) for 45 min at 37 °C. Then, organoid pellet was resuspended in Cell Culture Freezing Medium (Beyotime, China, C0210). The stock vials were stored at -80°C for 24 h and then transferred to the liquid nitrogen tank for long-term storage. For the first 2 weeks after thawing, the culture medium was supplemented with Y-27632 (10 μM) so as to ensure organoid growth.

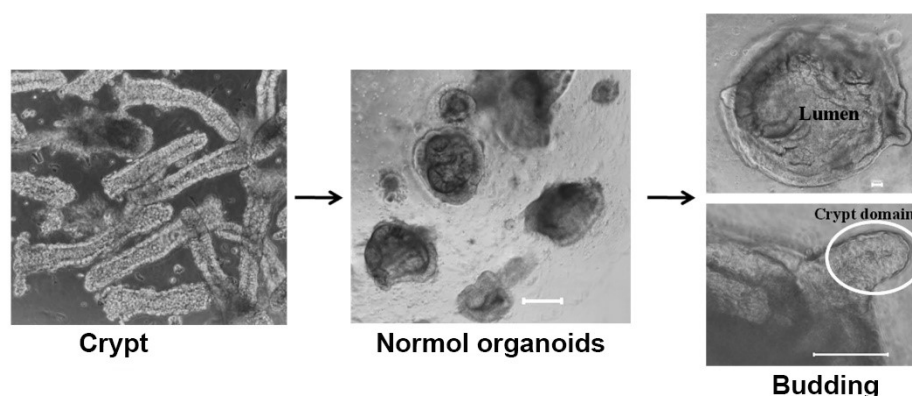

Figure S1. Representative images of human normal colon organoids development from crypts. After a few days of cultivation, normal organoids show budding state, consisting of a central lumen lined by villus-like epithelium and several surrounding crypt-like domains. Scale bar, 100 μM.

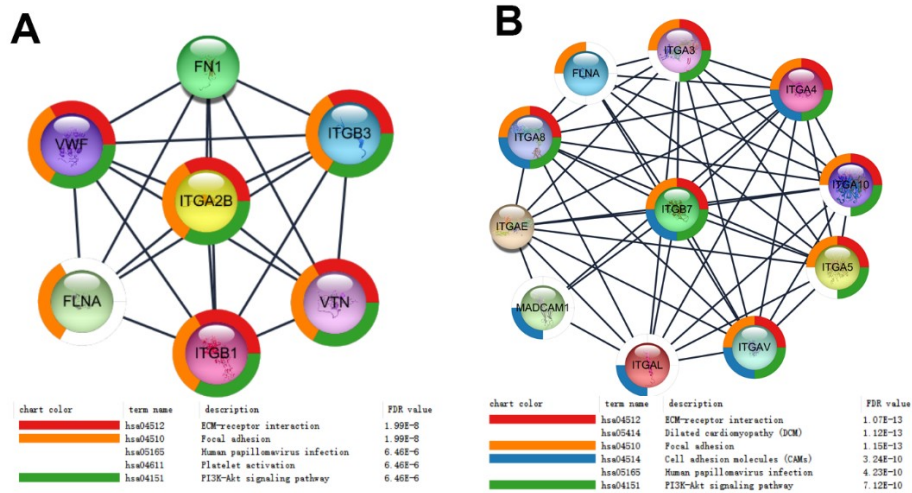

Figure S2. Subnetworks based on *ITGA2B* (A) and *ITGB7* (B). Significantly candidate genes including *ITGA2B* and *ITGB7* play central roles in ECM-integrin pathway.

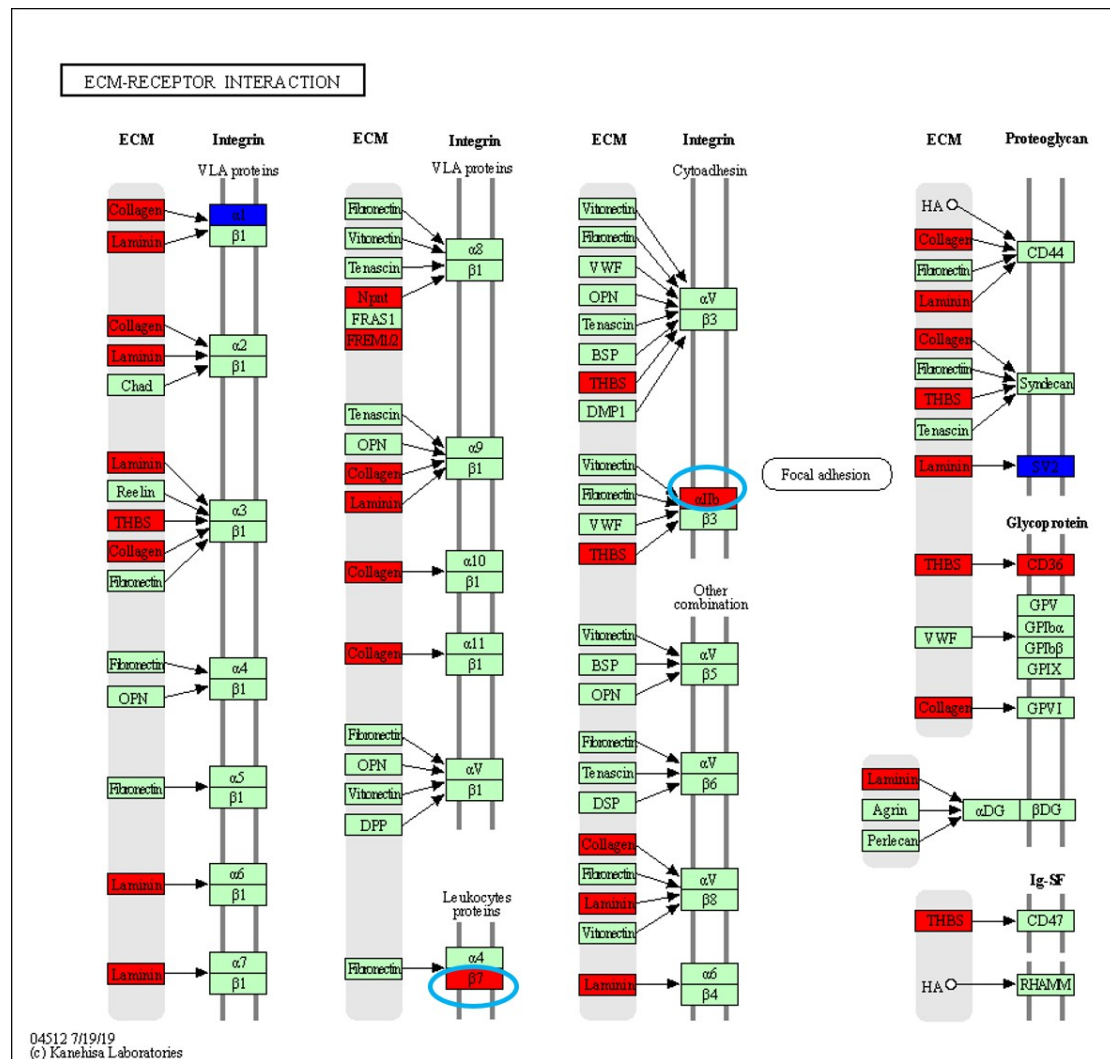

Figure S3. Pathway analysis of ECM-receptor interaction. Red represents up-regulated proteins and blue for down-regulated proteins.

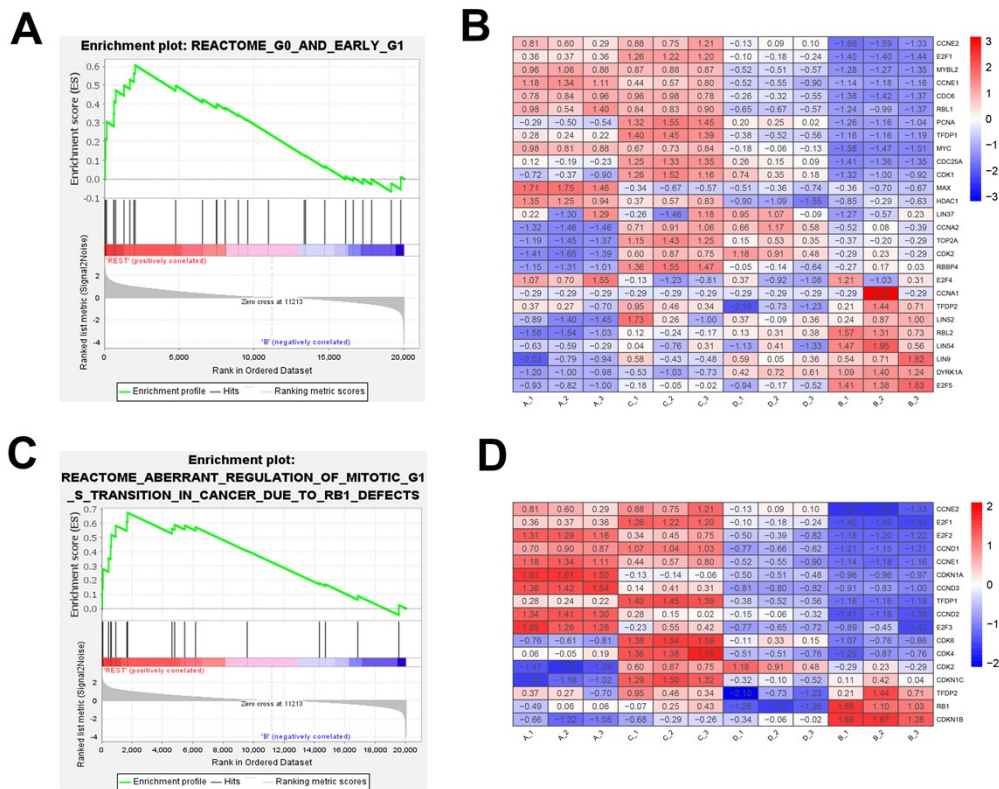

Figure S4. Result of gene set enrichment analysis (GSEA). (A) Enrichment plot of “G0 and early G1” between NaB-treated and control samples. (B) Heatmap of get sets in “G0 and early G1” pathway based on transcripts expression. (C) Enrichment plot of “aberrant regulation of mitotic G1/S transition in cancer due to RB1 defects” between NaB-treated and control samples. (D) Heatmap of get sets in “aberrant regulation of mitotic G1/S transition in cancer due to RB1 defects” based on transcript expression.

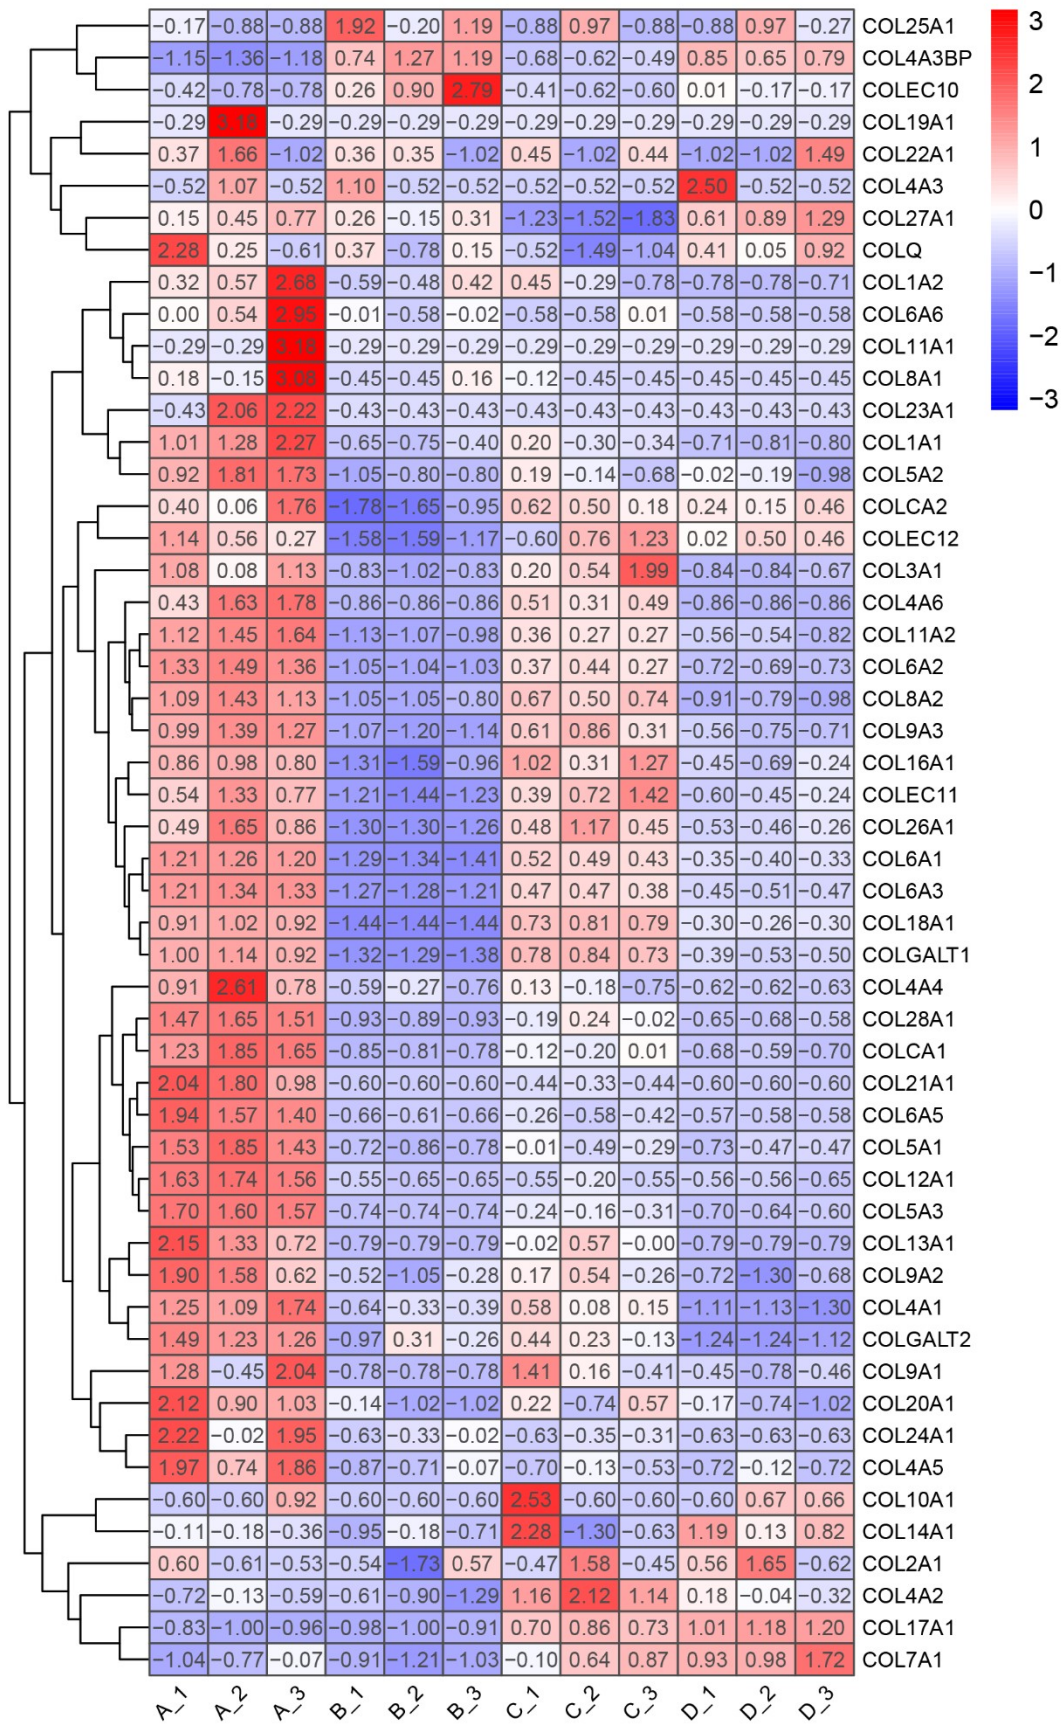

Figure S5. The expression levels of all collagen family genes in the samples.

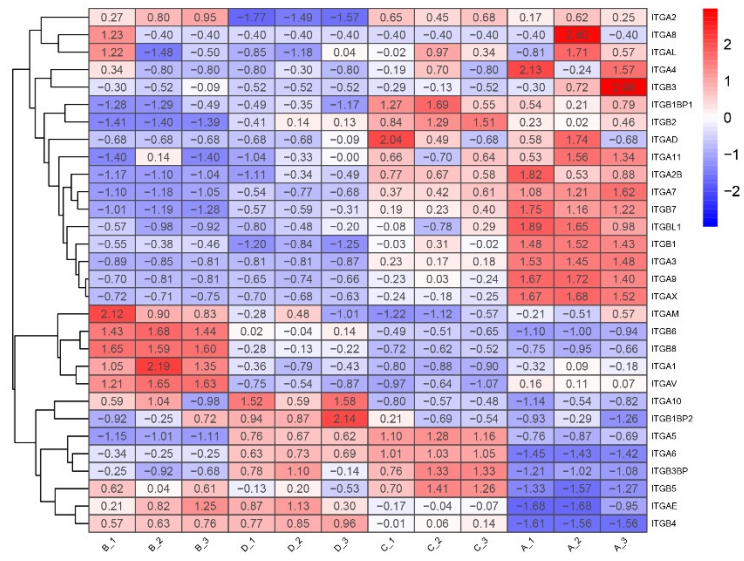

Figure S6. The expression levels of all integrin family genes in the samples.

**Table S1 The KEGG terms enriched in DEGs**

| Term                                   | Gene count | p value     | Significant genes                                                                                         |
|----------------------------------------|------------|-------------|-----------------------------------------------------------------------------------------------------------|
| Complement and coagulation cascades    | 11         | 4.69556E-05 | CFD, C3, CR2, C6G, CFH, PLA1, PROS1, SERPING1, C4BPB, A2M, KNG1                                           |
| Hematopoietic cell lineage             | 12         | 7.16522E-05 | CR2, HLA-DRB5, CD8B, IL1R1, ANPEP, ITGA1, ITGA2B, CD7, CD1D, CD36, CD33, HLA-DRB1                         |
| Lishmaniasis                           | 10         | 0.0003215   | C3, MAPK11, HLA-DMA, HLA-DRB5, NOS2, TGFβ3, ITGB2, TLR4, HLA-DRB1, HLA-DPA1                               |
| FCM-receptor interaction               | 11         | 0.000339118 | COMP, LAMA2, SV2B, LAMA1, COL6A2, COL11A2, ITGA1, ITGA2B, COL6A3, ITGB7, CD36                             |
| Phagosome                              | 14         | 0.000754856 | COLEC12, COLEC11, HLA-DRB5, ITGB2, TUBB4A, HLA-G, C3, COMP, HLA-DMA, CTS1, CD36, TLR4, HLA-DRB1, HLA-DPA1 |
| Staphylococcus aureus infection        | 8          | 0.001305503 | CFD, C3, HLA-DMA, HLA-DRB5, CFH, ITGB2, HLA-DRB1, HLA-DPA1                                                |
| Legionellosis                          | 8          | 0.001305503 | C3, ITGB2, EFF1A2, IL18, CXCL1, CXCL3, CXCL2, TLR4                                                        |
| Cell adhesion molecules (CAMs)         | 13         | 0.001493909 | HLA-DRB5, ITGB2, HLA-G, CLDN11, HLA-DMA, NFASC, PTPRC, CD8B, CLDN18, ITGB7, TIGIT, HLA-DRB1, HLA-DPA1     |
| Rheumatoid arthritis                   | 10         | 0.001562851 | HLA-DMA, HLA-DRB5, TGFβ3, MMP1, CTS1, ITGB2, IL18, TLR4, HLA-DRB1, HLA-DPA1                               |
| Inflammatory bowel disease (IBD)       | 8          | 0.003523692 | HLA-DMA, HLA-DRB5, TGFβ3, RORC, IL18, TLR4, HLA-DRB1, HLA-DPA1                                            |
| Malaria                                | 7          | 0.003866474 | COMP, TGFβ3, ITGB2, IL18, CD36, HBA1, TLR4                                                                |
| Amoebiasis                             | 10         | 0.005554102 | C6G, LAMA2, NOS2, IL1R1, TGFβ3, PRKCB, LAMA1, COL11A2, ITGB2, TLR4                                        |
| Toxoplasmosis                          | 10         | 0.00706023  | MAPK11, HLA-DMA, HLA-DRB5, LAMA2, NOS2, TGFβ3, LAMA1, TLR4, HLA-DRB1, HLA-DPA1                            |
| Tuberculosis                           | 13         | 0.008951785 | HLA-DRB5, NOS2, TGFβ3, ITGB2, IL18, C3, MAPK11, HLA-DMA, ITGAX, LBP, TLR4, HLA-DRB1, HLA-DPA1             |
| Mineral absorption                     | 6          | 0.011257196 | MT2A, ATP1A3, MTIG, MTIH, MTIE                                                                            |
| Arachidonic acid metabolism            | 7          | 0.011288206 | GPX3, CYP4F2, GPX8, PLA2G3, CYP4F8, ALOX15B, PTGS1                                                        |
| Salmonella infection                   | 8          | 0.014363393 | MAPK11, NOS2, IL18, CXCL1, LBP, CXCL3, CXCL2, TLR4                                                        |
| Graft-versus-host disease              | 5          | 0.018380837 | HLA-DMA, HLA-DRB5, HLA-G, HLA-DRB1, HLA-DPA1                                                              |
| Protein digestion and absorption       | 8          | 0.01929757  | COL18A1, PRSS1, MEP1B, MEP1A, COL6A2, COL11A2, COL6A3, ATP1A3                                             |
| Allograft rejection                    | 5          | 0.026955161 | HLA-DMA, HLA-DRB5, HLA-G, HLA-DRB1, HLA-DPA1                                                              |
| Pertussis                              | 7          | 0.028681117 | C3, MAPK11, NOS2, ITGB2, SERPING1, C4BPB, TLR4                                                            |
| Antigen processing and presentation    | 7          | 0.030362124 | HLA-DMA, HLA-DRB5, CD8B, CTS1, HLA-G, HLA-DRB1, HLA-DPA1                                                  |
| Viral myocarditis                      | 6          | 0.03143227  | HLA-DMA, HLA-DRB5, ITGB2, HLA-G, HLA-DRB1, HLA-DPA1                                                       |
| Steroid hormone biosynthesis           | 6          | 0.033559443 | SULT1E1, HSD3B1, CYP11A2, UGT2A3, UGT2B7, UGT2A1, SULT1A2                                                 |
| Chemical carcinogenesis                | 7          | 0.037726826 | ALDH3A1, ALDH3B2, CYP11A2, UGT2A3, UGT2B7, SULT2A1, SULT1A2                                               |
| Cytokine-cytokine receptor interaction | 14         | 0.039269633 | CCR1, CNTR, IL1R1, TGFβ3, CD70, TNFRSF18, IL18, CXCL1, LIFR, CXCL3, CXCL2, BMP2, TNFRSF8, CCL26           |
| Type 1 diabetes mellitus               | 5          | 0.040550025 | HLA-DMA, HLA-DRB5, HLA-G, HLA-DRB1, HLA-DPA1                                                              |
| TGF-beta signaling pathway             | 7          | 0.046146221 | CDKN2B, BMP2, LEFTY1, TGFβ3, BAMBI, LTBP1, SMAD7                                                          |

**Table S2 Gene set enrichment analysis (GSEA) analysis**

| REACTOME                                                                          | SIZE | ES      | NES     | NOM p-val | FDR q-val | FWER p-val | RANK AT MAX   | LEADING EDGE         |
|-----------------------------------------------------------------------------------|------|---------|---------|-----------|-----------|------------|---------------|----------------------|
| REACTOME_INITIAL_TRIGGERING_OF_COMPLEMENT                                         | 22   | 0.64192 | 1.70868 | 0         | 1         | 0.245      | 598 tags=23%  | list=3%, signal=23%  |
| REACTOME_METABOLISM_OF_ANGIOTENSINOGEN_TO_ANGIOTENSIN                             | 17   | 0.81209 | 1.695   | 0         | 1         | 0.276      | 1185 tags=41% | list=6%, signal=44%  |
| REACTOME_COMPLEMENT_CASCADE                                                       | 57   | 0.59681 | 1.58431 | 0         | 1         | 0.598      | 634 tags=23%  | list=3%, signal=23%  |
| REACTOME_FORMATION_OF_FIBRIN_CLOT_CLOTTING_CASCADE                                | 39   | 0.67171 | 1.55176 | 0         | 1         | 0.656      | 3520 tags=49% | list=18%, signal=59% |
| REACTOME_CARGO_CONCENTRATION_IN_THE_ER                                            | 33   | 0.49566 | 1.54555 | 0         | 1         | 0.66       | 3390 tags=30% | list=17%, signal=36% |
| REACTOME_PRE_NOTCH_PROCESSING_N_GOLGI                                             | 18   | 0.56103 | 1.48347 | 0         | 1         | 0.862      | 3316 tags=33% | list=17%, signal=40% |
| REACTOME_PRE_NOTCH_EXPRESSION_AND_PROCESSING                                      | 49   | 0.39499 | 1.4524  | 0         | 1         | 0.934      | 3629 tags=31% | list=18%, signal=37% |
| REACTOME_PHASE_4_RESTING_MEMBRANE_POTENTIAL                                       | 19   | 0.69284 | 1.44015 | 0         | 1         | 0.949      | 2692 tags=37% | list=13%, signal=43% |
| REACTOME_CHAPERONE_MEDIATED_AUTOPHAGY                                             | 22   | 0.49732 | 1.43005 | 0         | 1         | 0.957      | 2897 tags=27% | list=14%, signal=32% |
| REACTOME_ILDIL_CILIFERANCE                                                        | 19   | 0.45725 | 1.42817 | 0         | 1         | 0.957      | 2155 tags=32% | list=11%, signal=35% |
| REACTOME_FGFR2_LIGAND_BINDING_AND_ACTIVATION                                      | 20   | 0.57077 | 1.42695 | 0         | 1         | 0.957      | 4295 tags=30% | list=21%, signal=38% |
| REACTOME_COLLAGEN_BIOSYNTHESIS_AND_MODIFYING_ENZYMES                              | 67   | 0.63973 | 1.41771 | 0         | 1         | 0.957      | 2696 tags=42% | list=13%, signal=48% |
| REACTOME_SEROTONIN_NEUROTRANSMITTER_RELEASE_CYCLE                                 | 18   | 0.68426 | 1.38208 | 0         | 1         | 0.993      | 3207 tags=44% | list=16%, signal=53% |
| REACTOME_COLLAGEN_FORMATION                                                       | 90   | 0.58878 | 1.37823 | 0         | 1         | 0.995      | 4117 tags=47% | list=21%, signal=58% |
| REACTOME_NUCLEOTIDE_CATABOLISM                                                    | 35   | 0.51596 | 1.31387 | 0         | 1         | 1          | 4283 tags=34% | list=21%, signal=44% |
| REACTOME_ARACHIDONIC_ACID_METABOLISM                                              | 58   | 0.54173 | 1.42879 | 0.0055351 | 1         | 0.957      | 3751 tags=45% | list=19%, signal=55% |
| REACTOME_BINDING_AND_UPTAKE_OF_LIGANDS_BY_SCAVENGER_RECEPTORS                     | 42   | 0.50038 | 1.31846 | 0.0075472 | 1         | 1          | 5741 tags=57% | list=29%, signal=80% |
| REACTOME_SYNAPTIC_ADHESION_LIKE_MOLECULES                                         | 21   | 0.5754  | 1.41736 | 0.0083857 | 1         | 0.957      | 3565 tags=33% | list=18%, signal=41% |
| REACTOME_REGULATION_OF_INSULIN_LIKE_GROWTH_FACTOR_IGF_TRANSPORT_AND_UPTAKE        | 123  | 0.51256 | 1.40765 | 0.0092937 | 1         | 0.98       | 5077 tags=42% | list=25%, signal=56% |
| REACTOME_PHOSPHOLIPASE_C_MEDIATED_CASCADE_FGFR2                                   | 18   | 0.6319  | 1.49385 | 0.010453  | 1         | 0.836      | 4295 tags=33% | list=21%, signal=42% |
| REACTOME_SURFACTANT_METABOLISM                                                    | 30   | 0.5678  | 1.42954 | 0.0112613 | 1         | 0.957      | 5140 tags=40% | list=26%, signal=54% |
| REACTOME_IMMUNOREGULATORY_INTERACTIONS_BETWEEN_A_LYMPHOID_AND_A_NON_LYMPHOID_CELL | 128  | 0.54378 | 1.34093 | 0.012024  | 1         | 1          | 4976 tags=32% | list=25%, signal=42% |
| REACTOME_PHASE_1_FUNCTIONALIZATION_OF_COMPOUNDS                                   | 102  | 0.40223 | 1.3521  | 0.0136187 | 0.991342  | 1          | 3751 tags=29% | list=19%, signal=36% |
| REACTOME_PURINERGIC_SIGNALING_IN_LEISHMANIASIS_INFECTION                          | 26   | 0.48676 | 1.37069 | 0.0152964 | 1         | 1          | 2812 tags=27% | list=14%, signal=31% |
| REACTOME_EXTRACELLULAR_MATRIX_ORGANIZATION                                        | 301  | 0.49647 | 1.3201  | 0.0197842 | 1         | 1          | 4282 tags=43% | list=21%, signal=53% |
| REACTOME_BIOLOGICAL_OXIDATIONS                                                    | 215  | 0.37674 | 1.26751 | 0.0205607 | 1         | 1          | 5664 tags=37% | list=28%, signal=51% |
| REACTOME_FORMATION_OF_THE_CORNFIELD_ENVELOPE                                      | 128  | 0.45345 | 1.39602 | 0.0241449 | 1         | 0.993      | 3973 tags=20% | list=20%, signal=25% |
| REACTOME_FGFR2_MUTANT_RECEPTOR_ACTIVATION                                         | 33   | 0.42515 | 1.36033 | 0.0290102 | 1         | 1          | 4362 tags=30% | list=22%, signal=39% |
| REACTOME_TNFS BIND THE R PHYSIOLOGICAL RECEPTORS                                  | 29   | 0.51813 | 1.35804 | 0.0300885 | 0.987446  | 1          | 3364 tags=38% | list=17%, signal=46% |
| REACTOME_SYNTHESIS_OF_LEUKOTRIENES_LI1_AND_FOXINS_EX                              | 21   | 0.69918 | 1.53915 | 0.0311284 | 1         | 0.687      | 3751 tags=52% | list=19%, signal=64% |
| REACTOME_INTEGRIN_CELL_SURFACE_INTERACTIONS                                       | 85   | 0.56907 | 1.31316 | 0.0318949 | 0.989723  | 1          | 2703 tags=41% | list=13%, signal=47% |
